# Supplementary material for: Virtual Standardized Patients vs Academic Training for Learning Motivational Interviewing Skills in the US Department of Veterans Affairs and the US Military: A Randomized Trial
Source: PubMed Central journal article supplement (PMC7563071; doi:10.1001/jamanetworkopen.2020.17348), 2020-10-15
Supplement: jamanetwopen-e2017348-s003.pdf [file jamanetwopen-e2017348-s003.pdf]

## **Data Sharing Statement**

Reger GM, Norr AM, Rizzo AS, et al. Virtual standardized patients vs academic training for learning motivational interviewing skills in the US Department of Veterans Affairs and the US military: a randomized trial. Published online October 15, 2020. JAMA Netw Open. doi:10.1001/jamanetworkopen.2020.17348

Data available:

No

Explanation for why data not available:

Data will be released according to VHA and DOD guidelines, upon appropriate request.
